## Erratum

### Preclinical Toxicity Screening of Intrathecal Oxytocin in Rats and Dogs: Erratum

In the April 2014 issue, the article beginning on page 951 included an incorrect grant number in the Acknowledgments section. The corrected information should read: Supported in part by grant **GM048085** from the National Institutes of Health, Bethesda, Maryland.

#### Reference

Yaksh TL, Hobo S, Peters C, Osborn KG, Richter PJ Jr, Rossi SS, Grafe MR, Eisenach JC: Preclinical toxicity screening of intrathecal oxytocin in rats and dogs. *ANESTHESIOLOGY* 2014; 120:951–61
